# Microglia specific alternative splicing alterations in multiple sclerosis

Caiyun Qi<sup>1</sup>, Honglei Ren<sup>2</sup>, Yong Fan<sup>1</sup>

<sup>1</sup>Department of Obstetrics and Gynecology, Guangdong Provincial Key Laboratory of Major Obstetric Diseases, Guangdong Provincial Clinical Research Center for Obstetrics and Gynecology, Guangdong-Hong Kong-Macao Greater Bay Area Higher Education Joint Laboratory of Maternal-Fetal Medicine, The Third Affiliated Hospital of Guangzhou Medical University, Guangzhou, China

<sup>2</sup>Department of Neurology, Tianjin Neurological Institute, Tianjin Institute of Immunology, State Key Laboratory of Experimental Hematology, Haihe Laboratory of Cell Ecosystem, Tianjin Medical University General Hospital, Tianjin, China

**Correspondence to:** Caiyun Qi; **email:** [cyqi6365@tmu.edu.cn](mailto:cyqi6365@tmu.edu.cn)

**Keywords:** multiple sclerosis, alternative splicing, skipping exon, mutually exclusive exons, retained intron

**Received:** March 9, 2024

**Accepted:** July 17, 2024

**Published:** August 7, 2024

**Copyright:** © 2024 Qi et al. This is an open access article distributed under the terms of the [Creative Commons Attribution License](https://creativecommons.org/licenses/by/4.0/) (CC BY 4.0), which permits unrestricted use, distribution, and reproduction in any medium, provided the original author and source are credited.

## ABSTRACT

Several aberrant alternative splicing (AS) events and their regulatory mechanisms are widely recognized in multiple sclerosis (MS). Yet the cell-type specific AS events have not been extensively examined. Here we assessed the diversity of AS events using web-based RNA-seq data of sorted CD15<sup>+</sup>CD11b<sup>+</sup> microglia in white matter (WM) region from 10 patients with MS and 11 control subjects. The GSE111972 dataset was downloaded from GEO and ENA databases, aligned to the GRCh38 reference genome from ENSEMBL via STAR. rMATS was used to assess five types of AS events, alternative 3'SS (A3SS), alternative 5'SS (A5SS), skipped exon (SE), retained intron (RI) and mutually exclusive exons (MXE), followed by visualizing with *rmats2sashimiplo*t and *maser*. Differential genes or transcripts were analyzed using the *limma* R package. Gene ontology (GO) analysis was performed with the *clusterProfiler* R package. 42,663 raw counts of AS events were identified and 132 significant AS events were retained based on the filtered criteria: 1) average coverage >10 and 2) delta percent spliced in ( $\Delta$ PSI) >0.1. SE was the most common AS event (36.36%), followed by MXE events (32.58%), and RI (18.94%). Genes related to telomere maintenance and organization primarily underwent SE splicing, while genes associated with protein folding and mitochondrion organization were predominantly spliced in the MXE pattern. Conversely, genes experiencing RI were enriched in immune response and immunoglobulin production. In conclusion, we identified microglia-specific AS changes in the white matter of MS patients, which may shed light on novel pathological mechanisms underlying MS.

## INTRODUCTION

Alternative splicing (AS) is a pivotal transcriptional regulatory mechanism that arises from specific exons or introns that may or may not be included in a mature mRNA transcript. This process enables a single gene to produce multiple distinct mRNA molecules, thereby significantly increasing the diversity of the trans-

criptome and proteome [1]. AS is involved in a series of important biological processes, including proliferation, differentiation, development, and apoptosis regulation. The five common AS patterns are alternative 3' splice site (A3SS), alternative 5' splice site (A5SS), skipped exon (SE), retained intron (RI), and mutually exclusive exons (MXE) [2]. AS dynamically changes in different conditions, and aberrant alternative splicing can result

in various neurological diseases, tumors, and is implicated in aging, infection, inflammation, immune disorders, and metabolic disorders [1].

Multiple sclerosis (MS) is a chronic neuroinflammatory disease characterized by demyelination and neuroaxonal damage, leading to the formation of lesions throughout the central nervous system (CNS) [3, 4]. Aberrant alternative splicing (AS) events have been documented in MS. The soluble form of the interleukin-7 receptor alpha chain gene (sIL7R), produced by alternative splicing of IL7R exon 6, is a driver of increased MS risk [5]. Aberrant splicing of exon 3B (DM20) of PLP could disrupt the PLP/DM20 ratio in thymic epithelial cells and lead to self-epitope rejection from central tolerance [6]; In an animal model of MS, SJL/J mice lacking thymic DM20 experience loss of central tolerance to this epitope and increased susceptibility to MS [7]. Several other SE and MXE events have also been well examined in MS [8–12].

As resident CNS macrophages, microglia play a crucial role in inflammatory lesions and associated neural dysfunctions [13]. Depletion of microglia has been shown in studies to provide significant neuroprotection in both the EAE and CPZ mouse models of MS, highlighting their detrimental role [14–19]. On the contrary, microglia also contribute to myelin repair through various mechanisms. They can phagocytose myelin, cell debris, and large cargoes [20], leading to cholesterol efflux and potentially promoting OPC proliferation and functions [21]. Microglia secretes trophic factors that support OPC proliferation and differentiation into myelinating oligodendrocytes [22]. Additionally, microglia engage in juxtacrine interactions with OPCs, potentially promoting specific signaling pathways [23]. The aforementioned opposing capabilities may be associated with the phenotypic heterogeneity of microglia.

AS can modulate the phenotype and function of cells [24, 25], however, the microglia-specific AS events in MS have not been extensively examined. Here we aimed to systematically assess AS events in sorted microglia (CD15-CD11b<sup>+</sup>) cells within the white matter of patients with MS and elucidated microglia-specific AS changes in the context of MS.

## MATERIALS AND METHODS

### Dataset and reference genome

GSE111972 was retrieved from the GEO database (<https://www.ncbi.nlm.nih.gov/geo/query/acc.cgi?acc=GSE111972>). The raw fastq files were downloaded

from the ENA database using Linux via Axel (v2.17.11) (<https://www.ebi.ac.uk/ena/browser/view/PRJNA438707>). The human GRCh38 reference genome files were obtained from the ENSEMBL database. The DNA fasta file ([https://ftp.ensembl.org/pub/release-107/fasta/homo\\_sapiens/dna/](https://ftp.ensembl.org/pub/release-107/fasta/homo_sapiens/dna/)), cDNA fasta file ([https://ftp.ensembl.org/pub/release-107/fasta/homo\\_sapiens/cdna/](https://ftp.ensembl.org/pub/release-107/fasta/homo_sapiens/cdna/)), and GTF file ([https://ftp.ensembl.org/pub/release-107/gtf/homo\\_sapiens/](https://ftp.ensembl.org/pub/release-107/gtf/homo_sapiens/)) were downloaded for alignment and subsequent analysis.

### Alignment reading

Fastqc (v0.11.9) and multiqc (v1.13) were used for data quality control, trim\_galore (v0.6.7) was used to clean data by setting parameters: trim\_galore --phred33 -q 20 --length 36 --stringency 3 -a AGATCGGAAGAGC -o fastq-file, and then the clean data was aligned to the human reference GRCh38 genome by STAR (v2.7.10a) [26].

### Differentially expressed genes/transcripts identification

FeatureCounts and salmon were used to generate gene and transcript expression matrices, respectively. Differentially expressed genes/transcripts were determined using the Limma R package (v3.50.3), with a significance threshold set at a p-value of 0.05 and a log fold change (logFC) cutoff of 0.5. Unpaired Student's t-test was employed to compare gene and transcript expression data between MS patients and controls.

### Alternative splicing analysis

After STAR process, we used the sorted bam files for AS analysis via rMATs v4.0.2 and then visualized them by rmat2sashiplo. We identified five types of differential AS events (A3SS, A5SS, SE, MXE, RI) between MS and control subjects, significant AS events were defined with strict filtering thresholds: 1) average coverage >10, 2) delta percent spliced in ( $\Delta$ PSI) >0.1 and 3) FDR < 0.05. The final statistics and visualization analysis were finished by maser, rtracklayer, echarts4r and ggplot2 R package.

### Gene ontology enrichment analysis

GO enrichment analysis of differentially expressed genes was conducted using the clusterProfiler R package. Visualization of the enrichment results was achieved through the Cnetplot function of the GOplot R package. Significant GO terms were determined based on a p-value threshold of < 0.05.

## Availability of data and materials

The dataset GSE111972 (<https://www.ncbi.nlm.nih.gov/geo/query/acc.cgi?acc=GSE111972>) was obtained from the Gene Expression Omnibus (GEO) database. All data generated in the current study can be found in the article and Supplementary Material.

## RESULTS

### Global summary of alternative splicing events

Altogether, 42,663 AS events were detected in the GSE111972 datasets (Figure 1A). Initially, we sought to identify differential AS events between MS and control subjects. We employed rMATS to quantify the percent spliced in (PSI) value for each AS event. Utilizing stringent criteria (average coverage > 10 and  $\Delta\text{PSI} > 0.1$ ), we identified, on average, 132 significant AS events (Figure 1B). Principal component analysis (PCA) of AS events effectively distinguished between MS and control groups (Figure 1C). PSI values were found to be elevated in A3SS, A5SS, SE, and MXE events, whereas RI and

total AS events exhibited decreased PSI (Figure 1D, 1E). The top 2 events in each AS type are shown in Table 1, while all 132 significant AS events are listed in Supplementary Table 1.

### Analysis of SE events

SE events emerged as the most prevalent alternative splicing events, constituting 36.36% of the total (Figure 1B). GO enrichment analysis of genes associated with significant SE events revealed enrichment in processes such as telomere maintenance and organization, regulation of mRNA processing, and metabolic processes (Figure 2A, 2B). Noteworthy genes implicated in these processes included Heterogeneous Nuclear Ribonucleoprotein A1 (HNRNPA1) and Scaffold Attachment Factor B (SAFB) (Figure 2C). The PSI value signifies whether an exon is included in the transcript quantification, essentially reflecting the exon length. In Figure 2D, it is evident that HNRNPA1 exhibited fewer exons, while SAFB displayed a tendency to have more exons in the MS group.

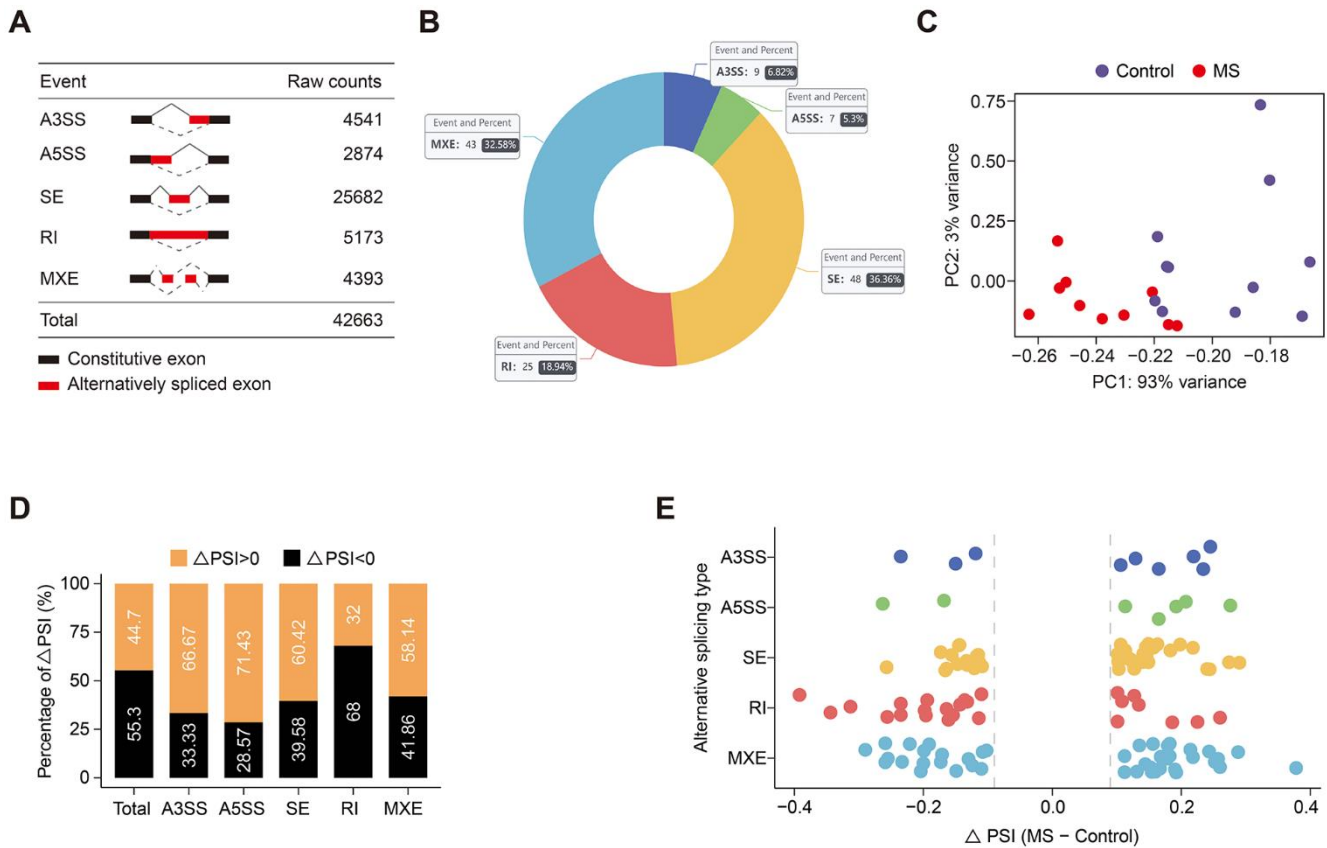

**Figure 1. Global distribution of alternative splicing events.** (A) Raw counts of each AS event. (B) The number and percentage of significant AS events. (C) PCA plot of each sample based on PSI values. (D, E) Bar (D) and dot (E) plots illustrate the  $\Delta\text{PSI}$  distribution of each subtype and global AS events.

**Table 1. Top 2 events of each AS subtype.**

| ID   | Gene    | p-value | FDR | $\Delta$ PSI | Type |
|------|---------|---------|-----|--------------|------|
| 531  | CTSB    | 0       | 0   | -0.023       | A3SS |
| 1411 | IFRD1   | 0       | 0   | -0.059       | A3SS |
| 5973 | YWHAE   | 0       | 0   | 0.028        | A5SS |
| 6458 | HNRNPA1 | 0       | 0   | -0.037       | A5SS |
| 424  | TKT     | 0       | 0   | 0.101        | SE   |
| 1957 | HSPH1   | 0       | 0   | 0.031        | SE   |
| 2766 | DDX3X   | 0       | 0   | -0.069       | RI   |
| 8346 | GNAS    | 0       | 0   | -0.039       | RI   |
| 715  | CD53    | 0       | 0   | 0.061        | MXE  |
| 1267 | CLK1    | 0       | 0   | 0.02         | MXE  |

### Analysis of MXE events

Mutually exclusive splicing represents a rare form of alternative splicing events, giving rise to alternative

isoforms by selectively retaining only one exon from a cluster of neighboring internal exons. In our study, MXE exhibited the second most substantial changes in AS events, accounting for 32.58% (Figure 1B).

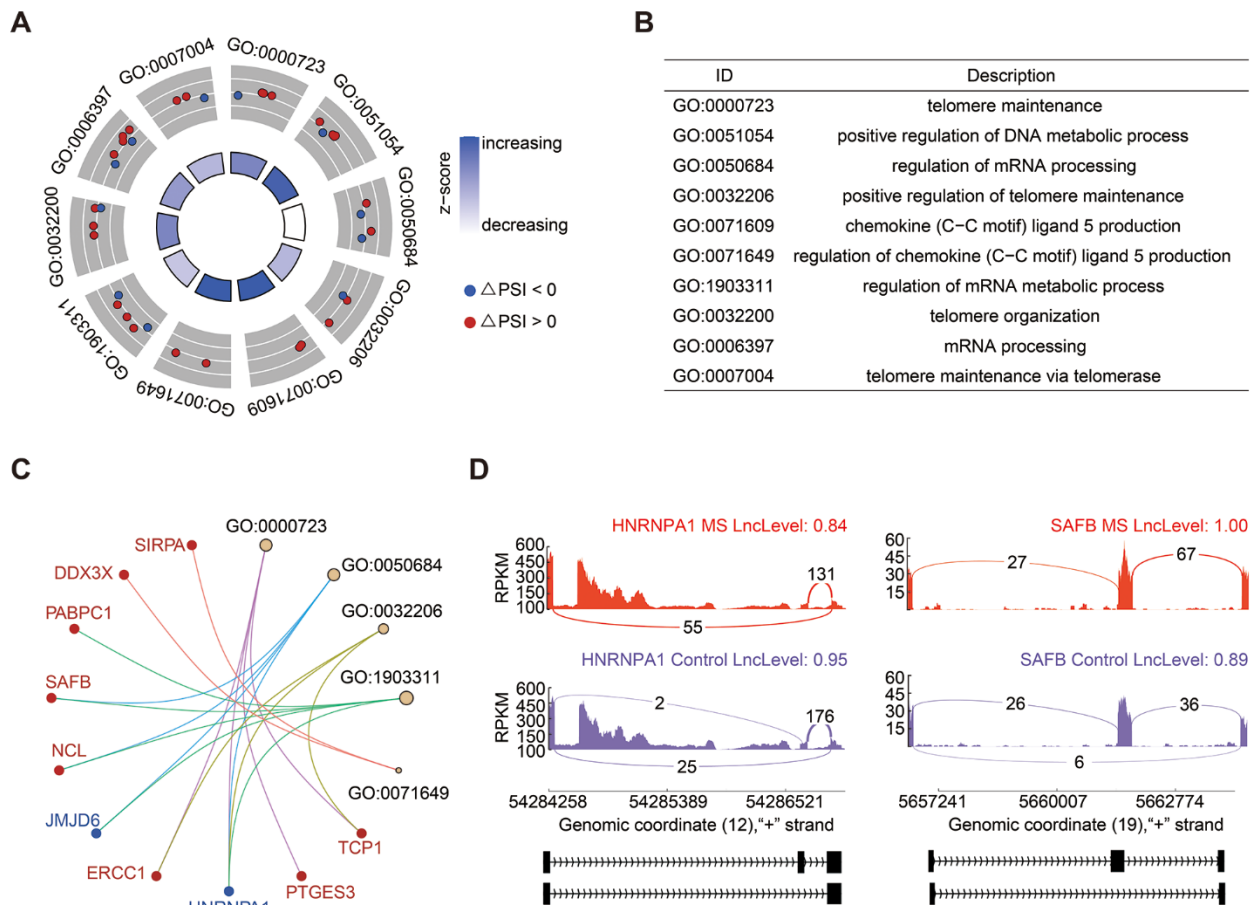

**Figure 2. Analysis of SE events.** (A, B) GO enrichment analysis of genes associated with SE events. (C) Cnetplot illustrating genes within enriched GO terms. HNRNPA1, highlighted in blue, exhibited decreased PSI levels, while SAFB, highlighted in red, demonstrated increased PSI levels. (D) Detailed sashimi plots depicting the splicing patterns of HNRNPA1 and SAFB. The red and purple colors denote the MS and control groups, respectively.



GO analysis revealed significant enrichment in processes related to protein folding and mitochondrion organization (Figure 3A, 3B). Notable genes implicated in these processes included Protein Disulfide Isomerase Family A Member 3 (PDIA3), which exhibited a decreased PSI value, and Plasminogen Activator and Urokinase Receptor (PLAUR), which displayed an increased PSI (Figure 3C). Sashimi plots illustrated that PDIA3 tended to have shorter transcripts, whereas PLAUR exhibited longer transcripts in the MS group (Figure 3D).

### Analysis of RI events

A total of 25 significant RI events were identified, constituting 18.94% of all AS events. GO analysis of genes associated with RI events predominantly enriched in immune response and immunoglobulin production (Figure 4A, 4B), including genes of PHB2 (Prohibitin 2) and HLA-A (Major Histocompatibility Complex, Class I, A) (Figure 4C). The PSI value in there represents the inclusion level of retained intron.

Consequently, both HLA-A and PHB2 exhibited shorter introns in the MS group (Figure 4D).

### Differentially expressed genes and transcripts

Transcript expression alterations did not consistently correlate with gene expression changes. Here, we investigated both differential gene and transcript expression levels. At the gene level, we identified 135 upregulated and 659 downregulated genes in the MS group compared with the control group (Figure 5A). Only four genes with significant AS events exhibited significant differences at the gene level. At the transcript level, we observed 328 upregulated and 1097 downregulated transcripts (Figure 5B). Heatmap illustrated the significant transcript expression differences between groups (Figure 5C). Among these transcripts, six genes with RI events were identified (Table 2). Several genes exhibited distinct transcript variations (ARHGEF1, CHD4, FCGRT, HSP90B1, PDIA3, STAB1, STXBP2). Notably, PDIA3 displayed contrasting expression changes across different

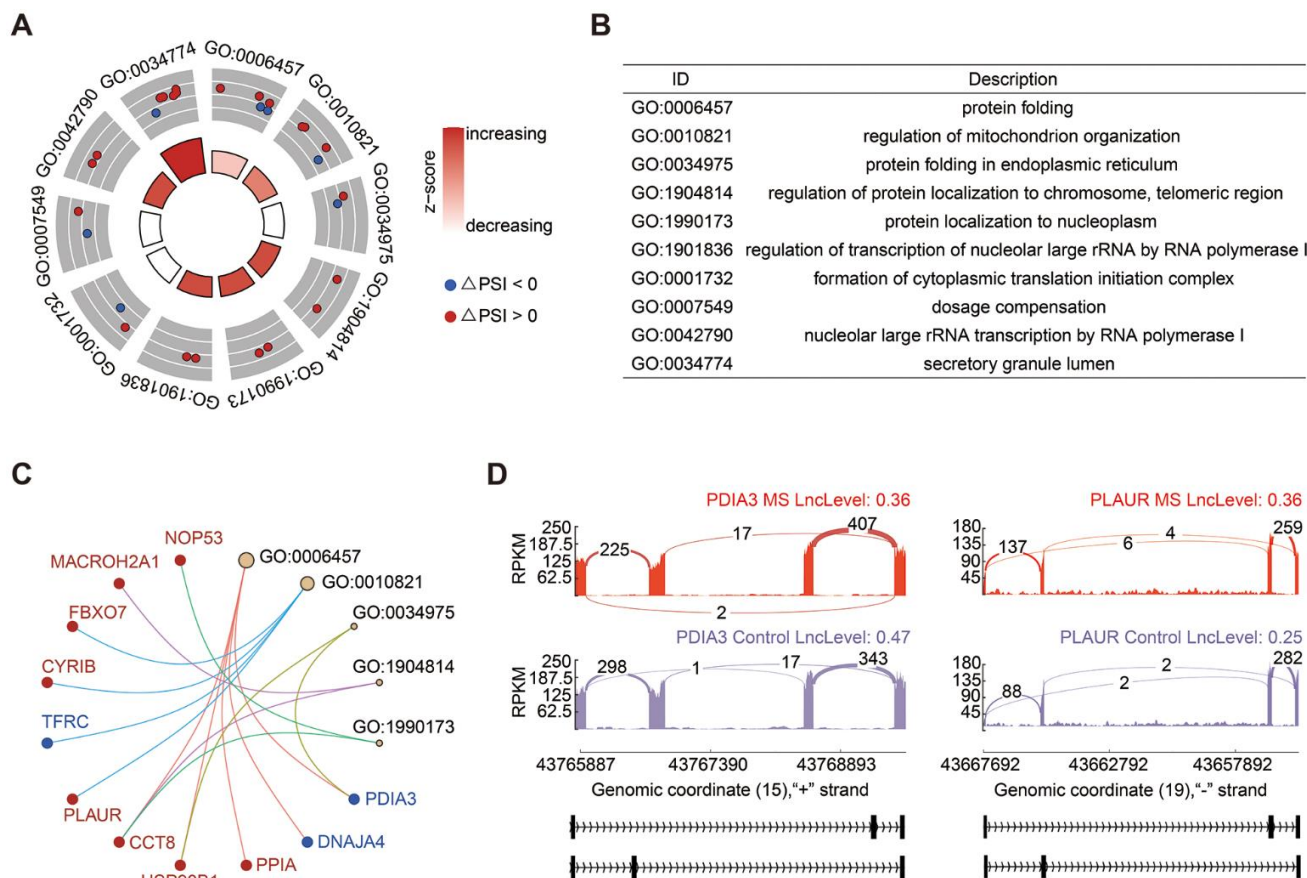

**Figure 3. Analysis of MXE events.** (A, B) GO enrichment analysis of genes involved in MXE events. (C) Cnetplot of genes in enriched GO terms. The PSI of PDIA3 was decreased and colored in blue, in contrast, PLAUR was colored in red. (D) Sashimi plots provided a detailed depiction of the alterations in transcripts of PDIA3 and PLAUR.

transcripts; specifically, ENST00000691893 and ENST00000690271 presented lower expression levels, while ENST00000687211 exhibited a higher expression level in the MS group (Figure 5D).

## DISCUSSION

Changes in AS events have been implicated in numerous diseases. Here, we investigated AS alterations in white matter microglia sorted by CD15 and CD11b from 10 MS patients and 11 control subjects. We identified five types of AS events, and genes implicated in various AS types exhibited unique biological functions. Despite several reported aberrant AS events in MS, we, for the first time, explored cell type-specific AS changes in MS.

Consistent with prior investigations, SE events were the most prevalent AS events, constituting 36.36% of occurrences [27–29], followed by MXE events at

32.58%, and RI events at 18.94%, while A3SS and A5SS events comprised 12.12%. GO enrichment revealed that genes involved in significant SE events were primarily associated with biological processes such as telomere maintenance and organization, regulation of mRNA processing, and metabolic processes. Notably, this included genes like HNRNPA1 and SAFB. HNRNPA1 encodes a member of the ubiquitously expressed heterogeneous nuclear ribonucleoprotein (hnRNP) family, whose RNA-binding proteins play a pivotal role in alternative splicing regulation. Mutations in HNRNPA1 have been identified in individuals with MS, potentially exacerbating neurodegeneration in this context [30]. Our findings indicate a shorter transcript of HNRNPA1 in MS. On the other hand, SAFB encodes the essential protein SAFB1, which governs gene regulation in the brain. Aberrant expression of SAFB has been documented in the nerve cells of brain regions affected by spinocerebellar ataxias (SCAs) and Huntington's

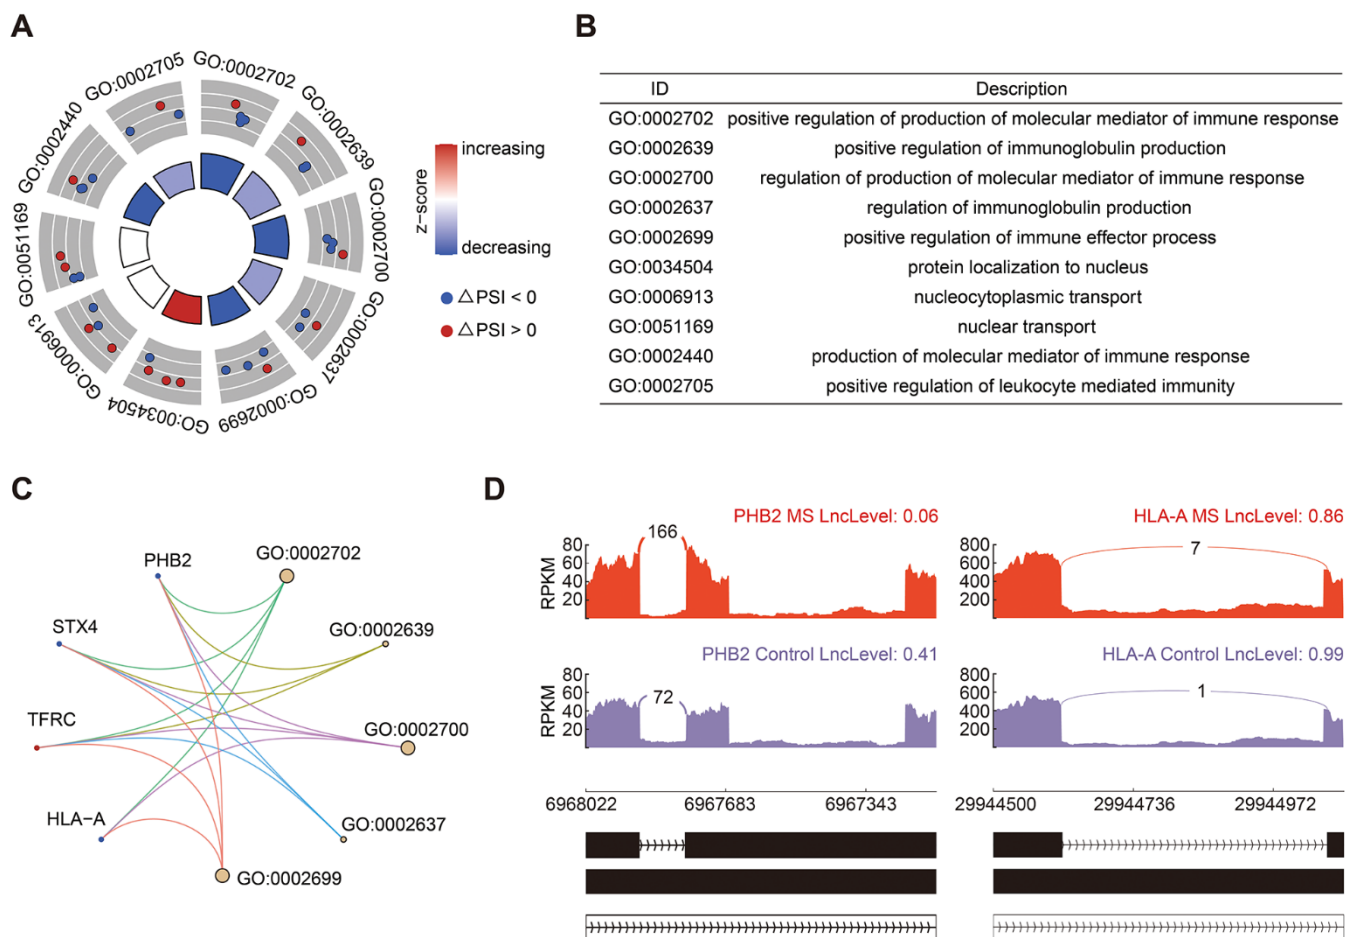

**Figure 4. Analysis of RI events.** (A, B) GO enrichment analysis of genes in RI events. (C) Cnetplot of genes involved in RI events. The decreased and increased PSI values were colored in blue and red, respectively. (D) Sashimi plots showed the detailed distribution of PHB2 and HLA-A transcripts.

disease (HD), where it is associated with specific polyglutamine expansion pathology. Our study unveils a longer transcript of SAFB in MS.

MXE is a rare subtype of AS events. In the splicing of MXE, two (or more) splicing events are no longer independent but are executed or disabled in a

coordinated manner [31]. It ranked as the second most prevalent AS event in our study. Genes associated with MXE events were primarily enriched in processes related to protein folding and mitochondrion organization, featuring prominent candidates such as PDIA3 and PLAUR. Prior research has suggested that the reduction of PDIA3 expression/activity in

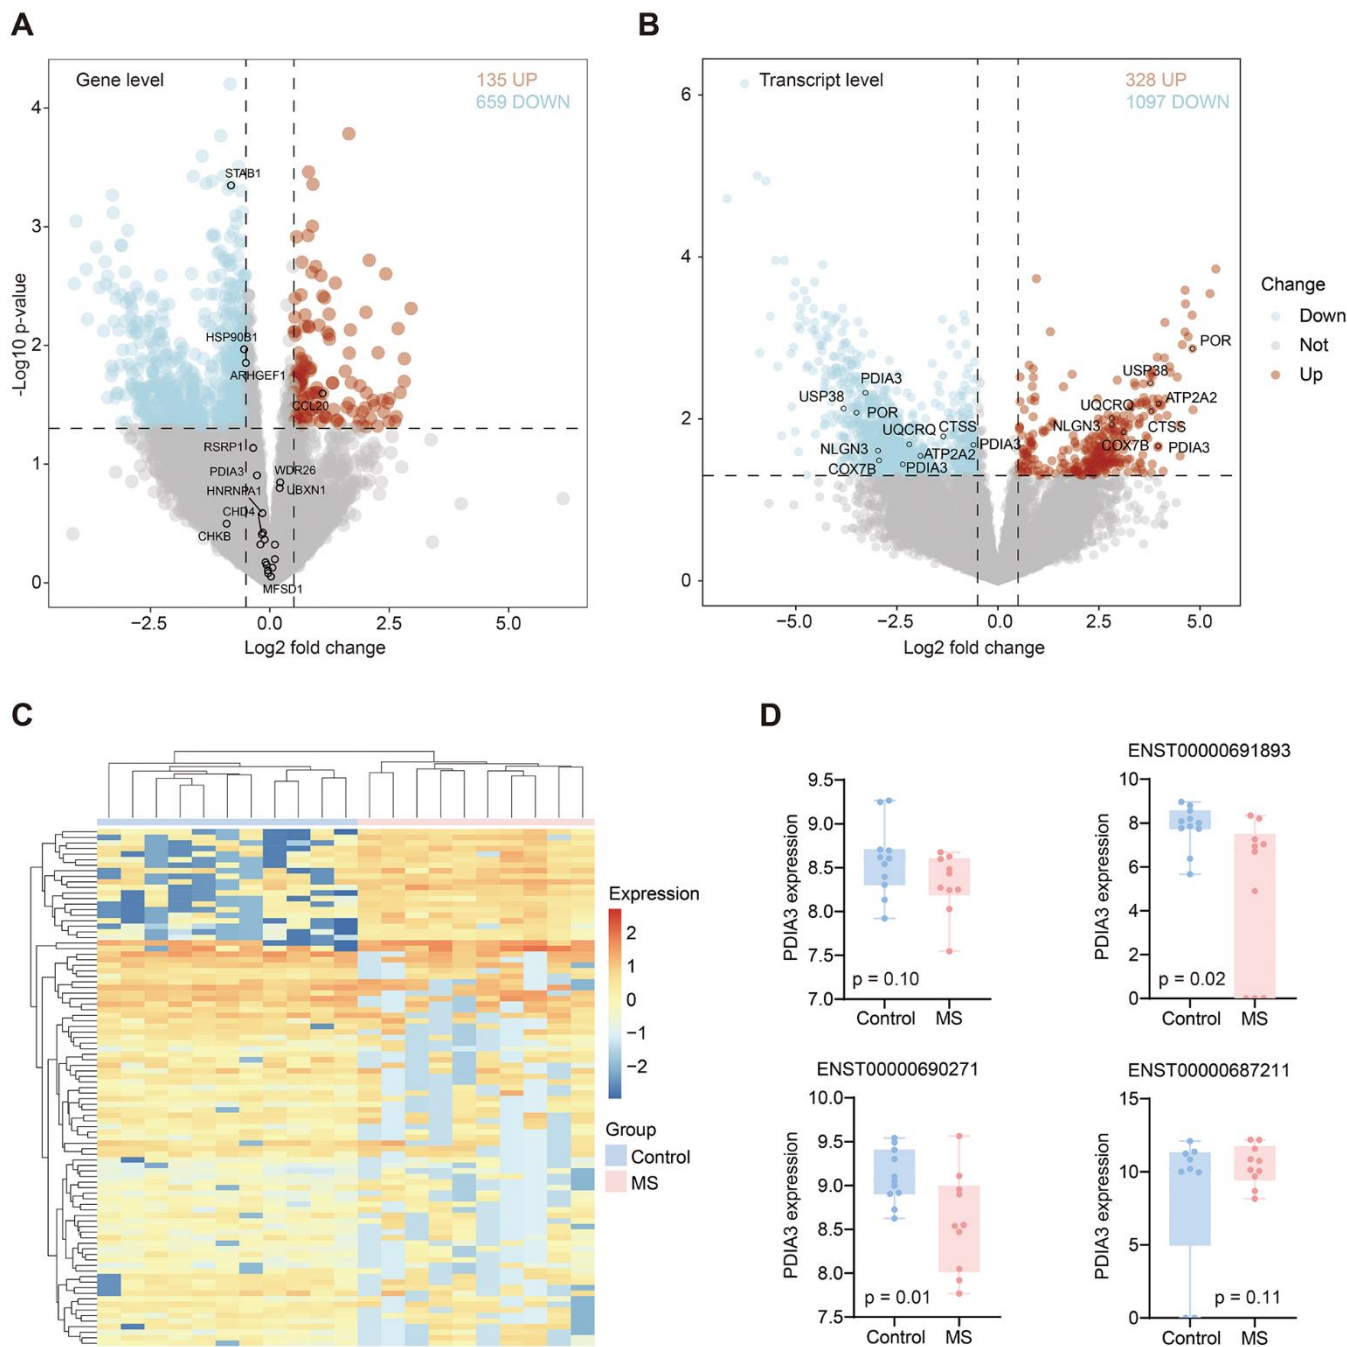

**Figure 5. Differentially expressed genes and transcripts.** (A) Differential genes volcano in MS compared with control group. Red and blue dots represent up and down-regulated genes, respectively. (B) Differential transcripts volcano in MS compared with control group. Red and blue dots represent up and down-regulated transcripts, respectively. (C) Heatmap displayed significantly different transcripts expression in MS and control group. (D) Boxplots showed the PDIA3 gene and its three transcripts' differential expression between MS and control groups.

**Table 2. Dysregulated transcripts involved in significant AS genes.**

| Transcript      | LogFC        | p-value     | Gene    | AS type | Change |
|-----------------|--------------|-------------|---------|---------|--------|
| ENST00000594221 | -2.443377412 | 0.037351933 | STXBP2  | A3SS    | Down   |
| ENST00000464225 | -1.975566306 | 0.048896379 | CHKB    | A3SS    | Down   |
| ENST00000602355 | -1.57576221  | 0.040415466 | STXBP2  | A3SS    | Down   |
| ENST00000698649 | -3.415544757 | 0.011224147 | IL6ST   | A5SS    | Down   |
| ENST00000337665 | -5.888629623 | 0.001529838 | ARHGEF1 | MXE     | Down   |
| ENST00000552051 | -5.01562484  | 0.014368326 | HSP90B1 | MXE     | Down   |
| ENST00000691893 | -3.27518664  | 0.004753761 | PDIA3   | MXE     | Down   |
| ENST00000550479 | -3.08718845  | 0.020093518 | HSP90B1 | MXE     | Down   |
| ENST00000599988 | -3.066989376 | 0.007804023 | FCGRT   | MXE     | Down   |
| ENST00000621632 | -2.584937117 | 0.021911611 | DDX24   | MXE     | Down   |
| ENST00000687173 | -2.353576829 | 0.036374286 | PDIA3   | MXE     | Down   |
| ENST00000482556 | -0.669787702 | 0.022193598 | PREX1   | MXE     | Down   |
| ENST00000595881 | -0.64643206  | 0.034239686 | FCGRT   | MXE     | Down   |
| ENST00000595897 | -0.633561872 | 0.030335524 | ARHGEF1 | MXE     | Down   |
| ENST00000690271 | -0.6058592   | 0.020887712 | PDIA3   | MXE     | Down   |
| ENST00000339082 | 1.625153521  | 0.049277156 | PLAUR   | MXE     | Up     |
| ENST00000486652 | 2.305175032  | 0.03466686  | WDR26   | MXE     | Up     |
| ENST00000687211 | 3.965479476  | 0.021572852 | PDIA3   | MXE     | Up     |
| ENST00000525717 | -6.266450368 | 7.23E-07    | UBXN1   | RI      | Down   |
| ENST00000336783 | -4.726381253 | 0.049410308 | ATXN2L  | RI      | Down   |
| ENST00000372862 | -3.237874105 | 0.026721332 | PABPC4  | RI      | Down   |
| ENST00000642686 | -3.107584683 | 0.008875577 | CHD4    | RI      | Down   |
| ENST00000481626 | -2.418593172 | 0.031647809 | STAB1   | RI      | Down   |
| ENST00000479355 | -2.404407387 | 0.015693043 | STAB1   | RI      | Down   |
| ENST00000647535 | -2.071991228 | 0.047449398 | CHD4    | RI      | Down   |
| ENST00000461325 | -0.93426492  | 0.005163376 | STAB1   | RI      | Down   |
| ENST00000462741 | -0.846464911 | 0.009625139 | STAB1   | RI      | Down   |
| ENST00000321725 | -0.807543744 | 0.000622462 | STAB1   | RI      | Down   |
| ENST00000471500 | -2.958506153 | 0.016720016 | MFS1    | SE      | Down   |
| ENST00000550482 | -2.651282586 | 0.022632429 | HNRNPA1 | SE      | Down   |
| ENST00000532696 | -1.850846736 | 0.023545454 | DENND5A | SE      | Down   |
| ENST00000243189 | -1.75741441  | 0.037455787 | RSRP1   | SE      | Down   |
| ENST00000456935 | 3.024758152  | 0.035062464 | MAN2B1  | SE      | Up     |
| ENST00000489160 | 3.818890414  | 0.002504536 | CCL20   | SE      | Up     |

glioblastoma cells can significantly restrain microglia pro-tumor polarization towards the M2 phenotype and the production of pro-inflammatory factors [32]. Our investigation revealed that PDIA3 exhibited shorter exons in MS; however, its overall gene expression did not change significantly. PLAUR has also been implicated in Glioma and is suggested to play roles in immunosuppression [33]. Interestingly, it demonstrated a tendency to have longer exons in MS. These two genes might be linked to alterations in microglial function in the context of MS and warrant further in-depth investigations.

RI stands out as the third most prevalent subtype of alternative splicing (AS) events. While a substantial portion of transcripts arising from RI events undergo degradation via nonsense-mediated decay (NMD), a subset retains translational potential [34]. Our analysis identified 25 RI events, with the associated genes primarily implicated in biological processes related to immune response and immunoglobulin production. Noteworthy genes within this category include PHB2 and HLA-A. Immune-related genes, particularly those encoding human leukocyte antigen (HLA), exhibit a



diversity of spliced isoforms. Previous research has reported that HLA-A\*03 confers an increased risk for multiple sclerosis (MS), whereas HLA-A\*02 exerts a protective effect [35]. Therefore, alternative splicing within the HLA-A gene may also be linked to the risk of MS. In the context of MS, both PHB2 and HLA-A displayed shorter transcripts. While an elevation in PHB2 protein levels in peripheral blood mononuclear cells (PBMC) has been documented [36], it is disappointing that we did not observe a significant alteration at the gene level for PHB2 in MS compared with control subjects.

AS can lead to changes in the expression levels of both genes and transcripts, although these changes are not always consistent due to the tight regulation of AS itself. In our study, we identified 135 upregulated and 659 downregulated genes in MS. However, only four genes (STAB1, HSP90B1, ARHGEF1, CCL20) exhibited significant changes at the gene level within significant AS events. Notably, PDIA3 demonstrated control over different transcripts with opposite changes at the transcript level, which is of particular interest. This suggests that AS may influence transcript expression prior to any observable changes at the gene expression level.

Together, our studies uncovered microglia-specific AS changes in MS. SE genes were found to be enriched in telomere function, MXE genes were implicated in protein and mRNA processing, and RI genes were associated with immune response. Collectively, these data may shed light on novel pathological mechanisms underlying MS.

## AUTHOR CONTRIBUTIONS

C.Q. designed the research. C.Q., H.L. analyzed data and drafted the manuscript. C.Q. and Y.F. edited the manuscript. All authors read and approved the manuscript.

## CONFLICTS OF INTEREST

The authors declare that they have no conflicts of interest.

## FUNDING

This study was supported in part by National Natural Science Foundation of China (82201498), National Postdoctoral Program for Innovative Talents (BX20240097), and Postdoctoral Science Foundation (2024M750652).

## REFERENCES

1. Evsyukova I, Somarelli JA, Gregory SG, Garcia-Blanco MA. Alternative splicing in multiple sclerosis and other autoimmune diseases. *RNA Biol.* 2010; 7:462–73. <https://doi.org/10.4161/rna.7.4.12301> PMID:20639696
2. Fu XD, Ares M Jr. Context-dependent control of alternative splicing by RNA-binding proteins. *Nat Rev Genet.* 2014; 15:689–701. <https://doi.org/10.1038/nrg3778> PMID:25112293
3. Stadelmann C, Wegner C, Brück W. Inflammation, demyelination, and degeneration - recent insights from MS pathology. *Biochim Biophys Acta.* 2011; 1812:275–82. <https://doi.org/10.1016/j.bbadis.2010.07.007> PMID:20637864
4. Mahad DH, Trapp BD, Lassmann H. Pathological mechanisms in progressive multiple sclerosis. *Lancet Neurol.* 2015; 14:183–93. [https://doi.org/10.1016/S1474-4422\(14\)70256-X](https://doi.org/10.1016/S1474-4422(14)70256-X) PMID:25772897
5. Galarza-Muñoz G, Briggs FBS, Evsyukova I, Schott-Lerner G, Kennedy EM, Nyanhete T, Wang L, Bergamaschi L, Widen SG, Tomaras GD, Ko DC, Bradrick SS, Barcellos LF, et al. Human Epistatic Interaction Controls IL7R Splicing and Increases Multiple Sclerosis Risk. *Cell.* 2017; 169:72–84.e13. <https://doi.org/10.1016/j.cell.2017.03.007> PMID:28340352
6. Wang E, Dimova N, Sperle K, Huang Z, Lock L, McCulloch MC, Edgar JM, Hobson GM, Cambi F. Deletion of a splicing enhancer disrupts PLP1/DM20 ratio and myelin stability. *Exp Neurol.* 2008; 214:322–30. <https://doi.org/10.1016/j.expneurol.2008.09.001> PMID:18835559
7. Klein L, Klugmann M, Nave KA, Tuohy VK, Kyewski B. Shaping of the autoreactive T-cell repertoire by a splice variant of self protein expressed in thymic epithelial cells. *Nat Med.* 2000; 6:56–61. <https://doi.org/10.1038/71540> PMID:10613824
8. Hilton AA, Slavin AJ, Hilton DJ, Bernard CC. Characterization of cDNA and genomic clones encoding human myelin oligodendrocyte glycoprotein. *J Neurochem.* 1995; 65:309–18. <https://doi.org/10.1046/j.1471-4159.1995.65010309.x> PMID:7790876
9. Gilli F, Valentino P, Caldano M, Granieri L, Capobianco M, Malucchi S, Sala A, Marnetto F, Bertolotto A. Expression and regulation of IFNalpha/beta receptor in IFNbeta-treated patients with multiple sclerosis. *Neurology.* 2008; 71:1940–47. <https://doi.org/10.1212/01.wnl.0000327340.50284.8d> PMID:18971450
10. De Rosa V, Galgani M, Porcellini A, Colamatteo A, Santopaulo M, Zuchegna C, Romano A, De Simone S,

- Procaccini C, La Rocca C, Carrieri PB, Maniscalco GT, Salvetti M, et al. Glycolysis controls the induction of human regulatory T cells by modulating the expression of FOXP3 exon 2 splicing variants. *Nat Immunol.* 2015; 16:1174–84.  
<https://doi.org/10.1038/ni.3269> PMID:26414764
11. Paraboschi EM, Rimoldi V, Soldà G, Tabaglio T, Dall’Osso C, Saba E, Vigliano M, Salviati A, Leone M, Benedetti MD, Fornasari D, Saarela J, De Jager PL, et al. Functional variations modulating PRKCA expression and alternative splicing predispose to multiple sclerosis. *Hum Mol Genet.* 2014; 23:6746–61.  
<https://doi.org/10.1093/hmg/ddu392> PMID:25080502
12. Lynch KW, Weiss A. A CD45 polymorphism associated with multiple sclerosis disrupts an exonic splicing silencer. *J Biol Chem.* 2001; 276:24341–47.  
<https://doi.org/10.1074/jbc.M102175200> PMID:11306584
13. Distéfano-Gagné F, Bitarafan S, Lacroix S, Gosselin D. Roles and regulation of microglia activity in multiple sclerosis: insights from animal models. *Nat Rev Neurosci.* 2023; 24:397–415.  
<https://doi.org/10.1038/s41583-023-00709-6> PMID:37268822
14. Beckmann N, Giorgetti E, Neuhaus A, Zurbrugg S, Accart N, Smith P, Perdoux J, Perrot L, Nash M, Desrayaud S, Wipfli P, Friauff W, Shimshek DR. Brain region-specific enhancement of remyelination and prevention of demyelination by the CSF1R kinase inhibitor BLZ945. *Acta Neuropathol Commun.* 2018; 6:9.  
<https://doi.org/10.1186/s40478-018-0510-8> PMID:29448957
15. Hagan N, Kane JL, Grover D, Woodworth L, Madore C, Saleh J, Sancho J, Liu J, Li Y, Proto J, Zelic M, Mahan A, Kothe M, et al. CSF1R signaling is a regulator of pathogenesis in progressive MS. *Cell Death Dis.* 2020; 11:904.  
<https://doi.org/10.1038/s41419-020-03084-7> PMID:33097690
16. Hwang D, Seyedsadr MS, Ishikawa LLW, Boehm A, Sahin Z, Casella G, Jang S, Gonzalez MV, Garifallou JP, Hakonarson H, Zhang W, Xiao D, Rostami A, et al. CSF-1 maintains pathogenic but not homeostatic myeloid cells in the central nervous system during autoimmune neuroinflammation. *Proc Natl Acad Sci USA.* 2022; 119:e2111804119.  
<https://doi.org/10.1073/pnas.2111804119> PMID:35353625
17. Marzan DE, Brügger-Verdon V, West BL, Liddelow S, Samanta J, Salzer JL. Activated microglia drive demyelination via CSF1R signaling. *Glia.* 2021; 69:1583–604.  
<https://doi.org/10.1002/glia.23980> PMID:33620118
18. Nissen JC, Thompson KK, West BL, Tsrka SE. Csf1R inhibition attenuates experimental autoimmune encephalomyelitis and promotes recovery. *Exp Neurol.* 2018; 307:24–36.  
<https://doi.org/10.1016/j.expneurol.2018.05.021> PMID:29803827
19. Wies Mancini VSB, Di Pietro AA, de Olmos S, Silva Pinto P, Vence M, Marder M, Igaz LM, Marcora MS, Pasquini JM, Correale JD, Pasquini LA. Colony-stimulating factor-1 receptor inhibition attenuates microglial and myelin loss but exacerbates neurodegeneration in the chronic cuprizone model. *J Neurochem.* 2022; 160:643–61.  
<https://doi.org/10.1111/jnc.15566> PMID:34935149
20. Grajchen E, Hendriks JJA, Bogie JF. The physiology of foamy phagocytes in multiple sclerosis. *Acta Neuropathol Commun.* 2018; 6:124.  
<https://doi.org/10.1186/s40478-018-0628-8> PMID:30454040
21. Berghoff SA, Spieth L, Sun T, Hosang L, Schlaphoff L, Depp C, Düking T, Winchenbach J, Neuber J, Ewers D, Scholz P, van der Meer F, Cantuti-Castelvetri L, et al. Microglia facilitate repair of demyelinated lesions via post-squalene sterol synthesis. *Nat Neurosci.* 2021; 24:47–60.  
<https://doi.org/10.1038/s41593-020-00757-6> PMID:33349711
22. Miron VE, Boyd A, Zhao JW, Yuen TJ, Ruckh JM, Shadrach JL, van Wijngaarden P, Wagers AJ, Williams A, Franklin RJM, Ffrench-Constant C. M2 microglia and macrophages drive oligodendrocyte differentiation during CNS remyelination. *Nat Neurosci.* 2013; 16:1211–18.  
<https://doi.org/10.1038/nn.3469> PMID:23872599
23. Sherafat A, Pfeiffer F, Reiss AM, Wood WM, Nishiyama A. Microglial neuropilin-1 promotes oligodendrocyte expansion during development and remyelination by trans-activating platelet-derived growth factor receptor. *Nat Commun.* 2021; 12:2265.  
<https://doi.org/10.1038/s41467-021-22532-2> PMID:33859199
24. Larionova TD, Bastola S, Aksinina TE, Anufrieva KS, Wang J, Shender VO, Andreev DE, Kovalenko TF, Arapidi GP, Shnaider PV, Kazakova AN, Latyshev YA, Tatarskiy VV, et al. Alternative RNA splicing modulates ribosomal composition and determines the spatial phenotype of glioblastoma cells. *Nat Cell Biol.* 2022; 24:1541–57.  
<https://doi.org/10.1038/s41556-022-00994-w> PMID:36192632

25. Green ID, Liu R, Wong JJ. The Expanding Role of Alternative Splicing in Vascular Smooth Muscle Cell Plasticity. *Int J Mol Sci.* 2021; 22:10213. <https://doi.org/10.3390/ijms221910213> PMID:34638554
26. Dobin A, Davis CA, Schlesinger F, Drenkow J, Zaleski C, Jha S, Batut P, Chaisson M, Gingeras TR. STAR: ultrafast universal RNA-seq aligner. *Bioinformatics.* 2013; 29:15–21. <https://doi.org/10.1093/bioinformatics/bts635> PMID:23104886
27. Kim P, Yang M, Yiya K, Zhao W, Zhou X. ExonSkipDB: functional annotation of exon skipping event in human. *Nucleic Acids Res.* 2020; 48:D896–907. <https://doi.org/10.1093/nar/gkz917> PMID:31642488
28. Lu Y, Tan L, Xie J, Cheng L, Wang X. Distinct microglia alternative splicing in Alzheimer’s disease. *Aging (Albany NY).* 2022; 14:6554–66. <https://doi.org/10.18632/aging.204223> PMID:36006403
29. Lu Y, Yue D, Xie J, Cheng L, Wang X. Ontology Specific Alternative Splicing Changes in Alzheimer’s Disease. *Front Genet.* 2022; 14:13:926049. <https://doi.org/10.3389/fgene.2022.926049> PMID:35774499
30. Clarke JWE, Thibault PA, Salapa HE, Kim DE, Hutchinson C, Levin MC. Multiple Sclerosis-Associated hnRNPA1 Mutations Alter hnRNPA1 Dynamics and Influence Stress Granule Formation. *Int J Mol Sci.* 2021; 22:2909. <https://doi.org/10.3390/ijms22062909> PMID:33809384
31. Pohl M, Bortfeldt RH, Grützmann K, Schuster S. Alternative splicing of mutually exclusive exons—a review. *Biosystems.* 2013; 114:31–38. <https://doi.org/10.1016/j.biosystems.2013.07.003> PMID:23850531
32. Chiavari M, Ciotti GMP, Canonico F, Altieri F, Lacal PM, Graziani G, Navarra P, Lisi L. PDIA3 Expression in Glioblastoma Modulates Macrophage/Microglia Pro-Tumor Activation. *Int J Mol Sci.* 2020; 21:8214. <https://doi.org/10.3390/ijms21218214> PMID:33153019
33. Zeng F, Li G, Liu X, Zhang K, Huang H, Jiang T, Zhang Y. Plasminogen Activator Urokinase Receptor Implies Immunosuppressive Features and Acts as an Unfavorable Prognostic Biomarker in Glioma. *Oncologist.* 2021; 26:e1460–69. <https://doi.org/10.1002/onco.13750> PMID:33687124
34. Li HD, Funk CC, McFarland K, Dammer EB, Allen M, Carrasquillo MM, Levites Y, Chakrabarty P, Burgess JD, Wang X, Dickson D, Seyfried NT, Duong DM, et al. Integrative functional genomic analysis of intron retention in human and mouse brain with Alzheimer’s disease. *Alzheimers Dement.* 2021; 17:984–1004. <https://doi.org/10.1002/alz.12254> PMID:33480174
35. Fogdell-Hahn A, Ligiers A, Grønning M, Hillert J, Olerup O. Multiple sclerosis: a modifying influence of HLA class I genes in an HLA class II associated autoimmune disease. *Tissue Antigens.* 2000; 55:140–48. <https://doi.org/10.1034/j.1399-0039.2000.550205.x> PMID:10746785
36. De Rasmio D, Ferretta A, Russo S, Ruggieri M, Lasorella P, Paolicelli D, Trojano M, Signorile A. PBMC of Multiple Sclerosis Patients Show Deregulation of OPA1 Processing Associated with Increased ROS and PHB2 Protein Levels. *Biomedicines.* 2020; 8:85. <https://doi.org/10.3390/biomedicines8040085> PMID:32290388

## SUPPLEMENTARY MATERIALS

### Supplementary Table

Please browse the Full Text version to see the data of Supplementary Table 1.

**Supplementary Table 1. The significant 132 AS events.**
