# Supplementary material for: Microglia specific alternative splicing alterations in multiple sclerosis
Source: Aging (Albany NY). 2024 Aug 7;16(15):11656–67. doi: 10.18632/aging.206045 (PMC11346782; doi:10.18632/aging.206045)
Supplement: Supplementary Table 1 [file aging-16-15-206045-s001.xlsx]

## Sheet: Sheet1
Supplementary Table 1. The significant 132 AS events.
ID	GeneID	geneSymbol	PValue	FDR	IncLevelDifference	AS_subtype
424	ENSG00000163931	TKT	0	0	0.101	SE
1462	ENSG00000089041	P2RX7	2.46756e-10	8.12459e-08	0.146	SE
2507	ENSG00000204386	NEU1	1.41132e-05	0.00127764	0.274	SE
3418	ENSG00000115310	RTN4	0.000576997	0.032519	-0.156	SE
5443	ENSG00000120438	TCP1	1.64299e-08	3.07995e-06	0.113	SE
8064	ENSG00000115009	CCL20	1.1617e-05	0.00110092	0.102	SE
9878	ENSG00000100813	ACIN1	2.36137e-05	0.00201477	0.24	SE
14097	ENSG00000117616	RSRP1	5.77337e-05	0.00447951	-0.132	SE
16463	ENSG00000283149	NA	6.8544e-05	0.00513221	-0.166	SE
16657	ENSG00000070495	JMJD6	7.25915e-07	9.51171e-05	-0.144	SE
19511	ENSG00000082996	RNF13	8.57017e-05	0.00621749	-0.115	SE
20836	ENSG00000215301	DDX3X	1.24829e-05	0.00116422	0.149	SE
24498	ENSG00000141905	NFIC	3.09631e-05	0.0025818	0.146	SE
24923	ENSG00000104774	MAN2B1	0	0	0.244	SE
26871	ENSG00000198053	SIRPA	0	0	0.106	SE
27327	ENSG00000184014	DENND5A	1.58441e-08	2.99198e-06	0.122	SE
28934	ENSG00000115053	NCL	0	0	0.149	SE
28936	ENSG00000115053	NCL	1.96509e-14	2.40322e-11	0.29	SE
31897	ENSG00000110958	PTGES3	7.82207e-07	0.000101458	0.103	SE
33042	ENSG00000178950	GAK	1.01384e-10	3.82903e-08	-0.147	SE
33120	ENSG00000070756	PABPC1	0	0	0.117	SE
34327	ENSG00000234741	GAS5	1.35285e-11	6.81253e-09	0.141	SE
40715	ENSG00000118855	MFSD1	0.000135809	0.00917855	-0.121	SE
40957	ENSG00000106066	CPVL	8.98348e-05	0.00649898	-0.113	SE
41377	ENSG00000160633	SAFB	0.000433716	0.0256062	0.114	SE
42809	ENSG00000169919	GUSB	2.10753e-06	0.000246026	0.102	SE
42876	ENSG00000153147	SMARCA5	6.1585e-09	1.30713e-06	0.157	SE
44690	ENSG00000103365	GGA2	9.7519e-05	0.00701536	-0.119	SE
45276	ENSG00000162923	WDR26	1.30849e-11	6.72091e-09	-0.133	SE
45579	ENSG00000170791	CHCHD7	8.13352e-05	0.00595507	-0.135	SE
49916	ENSG00000168374	ARF4	4.35848e-05	0.00344414	0.127	SE
50783	ENSG00000135486	HNRNPA1	0.000104324	0.00742176	-0.109	SE
51671	ENSG00000134352	IL6ST	4.55302e-13	3.43914e-10	-0.164	SE
53131	ENSG00000111011	RSRC2	0.000557007	0.0315785	0.125	SE
53993	ENSG00000269893	SNHG8	0.000177876	0.0116239	-0.117	SE
53994	ENSG00000269893	SNHG8	0.000191455	0.0123232	-0.116	SE
53996	ENSG00000269893	SNHG8	0.000177876	0.0116239	-0.117	SE
53997	ENSG00000269893	SNHG8	6.74645e-05	0.00506615	-0.257	SE
54640	ENSG00000173391	OLR1	3.76863e-09	8.64161e-07	0.198	SE
54641	ENSG00000173391	OLR1	0	0	0.183	SE
58920	ENSG00000042980	ADAM28	1.06558e-05	0.00101733	-0.145	SE
58931	ENSG00000042980	ADAM28	0.000131732	0.00895008	-0.173	SE
58935	ENSG00000042980	ADAM28	1.93646e-11	9.14321e-09	0.163	SE
58937	ENSG00000042980	ADAM28	4.06086e-12	2.37025e-09	0.218	SE
60742	ENSG00000012061	ERCC1	2.05484e-06	0.00024097	0.103	SE
64596	ENSG00000117115	PADI2	4.56679e-10	1.36377e-07	0.112	SE
64601	ENSG00000117115	PADI2	0	0	0.145	SE
72532	ENSG00000081791	DELE1	0.000127982	0.00878832	0.14	SE
157	ENSG00000204469	PRRC2A	8.09683e-08	8.21272e-06	-0.136	RI
973	ENSG00000129460	NGDN	9.4608e-05	0.00448998	-0.235	RI
989	ENSG00000010327	STAB1	6.55761e-05	0.00335867	-0.143	RI
1183	ENSG00000162191	UBXN1	1.65787e-06	0.000131941	-0.154	RI
1273	ENSG00000206503	HLA-A	0.000158984	0.00685355	-0.132	RI
1856	ENSG00000162032	SPSB3	1.85932e-06	0.000143556	-0.313	RI
2027	ENSG00000197989	SNHG12	0.000829271	0.0273237	-0.198	RI
2878	ENSG00000122566	HNRNPA2B1	0.000374754	0.01436	-0.11	RI
4052	ENSG00000117410	ATP6V0B	0.000115713	0.00534449	-0.164	RI
4205	ENSG00000182481	KPNA2	2.07549e-05	0.00119294	0.225	RI
4633	ENSG00000234741	GAS5	4.44089e-15	2.08843e-12	0.101	RI
5560	ENSG00000072274	TFRC	1.30431e-05	0.000812916	0.26	RI
5699	ENSG00000152291	TGOLN2	0.00026772	0.01091	0.134	RI
5713	ENSG00000237441	RGL2	0.000568147	0.0199524	-0.194	RI
6021	ENSG00000103496	STX4	0.000709507	0.0241466	-0.196	RI
6119	ENSG00000090621	PABPC4	4.33928e-06	0.000307495	0.186	RI
6307	ENSG00000215021	PHB2	2.6773e-12	7.28931e-10	-0.344	RI
7152	ENSG00000173992	CCS	1.08565e-09	1.65179e-07	-0.392	RI
7504	ENSG00000135506	OS9	4.98615e-06	0.000343911	-0.161	RI
7973	ENSG00000126883	NUP214	2.98502e-08	3.58103e-06	0.108	RI
7983	ENSG00000184205	TSPYL2	0.000670447	0.0229684	0.101	RI
8686	ENSG00000168488	ATXN2L	5.42597e-05	0.00283521	-0.114	RI
9520	ENSG00000255717	SNHG1	3.31113e-06	0.000241246	-0.256	RI
9534	ENSG00000255717	SNHG1	2.51438e-10	4.61002e-08	-0.235	RI
9654	ENSG00000111642	CHD4	5.85083e-05	0.00302663	0.127	RI
24	ENSG00000104870	FCGRT	7.15198e-06	0.00051506	0.135	MXE
83	ENSG00000107372	ZFAND5	0.000609597	0.0247959	0.112	MXE
575	ENSG00000132669	RIN2	0.000890842	0.0328863	0.179	MXE
940	ENSG00000124126	PREX1	0.000184475	0.00910563	-0.2	MXE
941	ENSG00000124126	PREX1	4.26329e-05	0.00249715	-0.233	MXE
1915	ENSG00000157557	ETS2	0.000474505	0.0200433	0.178	MXE
2053	ENSG00000161939	RNASEK-C17orf49	0.00125849	0.0438773	0.214	MXE
2351	ENSG00000084623	EIF3I	8.51878e-06	0.000594016	-0.259	MXE
2352	ENSG00000084623	EIF3I	1.46286e-05	0.000959155	-0.259	MXE
2954	ENSG00000104774	MAN2B1	6.3561e-05	0.00340516	-0.204	MXE
3236	ENSG00000167004	PDIA3	0.00051689	0.0214217	-0.11	MXE
3343	ENSG00000011422	PLAUR	0.000746425	0.028026	0.112	MXE
3641	ENSG00000089737	DDX24	0.000593187	0.0243539	0.192	MXE
3642	ENSG00000089737	DDX24	0.000646535	0.0256321	0.19	MXE
3863	ENSG00000100664	EIF5	8.1408e-06	0.000576815	0.156	MXE
3868	ENSG00000115091	ACTR3	0.00124011	0.0435826	0.152	MXE
3870	ENSG00000128512	DOCK4	0.000385197	0.0169217	-0.173	MXE
4305	ENSG00000153234	NR4A2	1.49854e-10	4.11443e-08	-0.124	MXE
4307	ENSG00000153234	NR4A2	0.000109477	0.00559226	-0.149	MXE
4497	ENSG00000140403	DNAJA4	0.000321291	0.0147024	-0.13	MXE
4580	ENSG00000164081	TEX264	4.74471e-08	5.78986e-06	0.378	MXE
4842	ENSG00000072274	TFRC	0.00115033	0.0410845	-0.221	MXE
5225	ENSG00000146701	MDH2	0.000689168	0.0267922	0.218	MXE
5330	ENSG00000113648	MACROH2A1	3.6263e-11	1.32753e-08	0.154	MXE
5339	ENSG00000162923	WDR26	6.25722e-13	3.92685e-10	-0.171	MXE
5367	ENSG00000090621	PABPC4	1.58229e-12	8.68875e-10	-0.102	MXE
5387	ENSG00000090621	PABPC4	1.19956e-06	0.000114558	0.144	MXE
5399	ENSG00000196262	PPIA	3.5697e-06	0.000285121	0.257	MXE
6378	ENSG00000143621	ILF2	3.61428e-05	0.00214561	0.252	MXE
6582	ENSG00000184588	PDE4B	0.000248834	0.0120124	-0.191	MXE
6583	ENSG00000184588	PDE4B	8.29708e-10	1.73567e-07	-0.29	MXE
6749	ENSG00000083896	YTHDC1	0.000646152	0.0256321	-0.199	MXE
6829	ENSG00000166598	HSP90B1	3.71866e-06	0.000291716	0.131	MXE
6830	ENSG00000166598	HSP90B1	2.20195e-08	3.02176e-06	0.182	MXE
6831	ENSG00000166598	HSP90B1	1.5046e-06	0.000134892	0.168	MXE
6839	ENSG00000153310	CYRIB	0.000431127	0.0183878	0.167	MXE
6864	ENSG00000100225	FBXO7	0.000304433	0.0140776	0.288	MXE
6867	ENSG00000082074	FYB1	0.000350507	0.015874	0.182	MXE
6973	ENSG00000105373	NOP53	1.28105e-05	0.000852673	0.16	MXE
7009	ENSG00000156261	CCT8	4.77023e-05	0.00268662	0.243	MXE
7489	ENSG00000173120	KDM2A	0.000494974	0.0207088	-0.255	MXE
8372	ENSG00000033627	ATP6V0A1	0.000659402	0.0258639	0.26	MXE
8476	ENSG00000076928	ARHGEF1	5.33269e-08	6.16487e-06	-0.108	MXE
1080	ENSG00000120438	TCP1	0.000311792	0.0205195	-0.15	A3SS
6393	ENSG00000234741	GAS5	8.54186e-10	1.68646e-07	0.106	A3SS
6824	ENSG00000153234	NR4A2	0.000168363	0.0116364	0.129	A3SS
6828	ENSG00000153234	NR4A2	2.27188e-08	3.6845e-06	0.234	A3SS
6829	ENSG00000153234	NR4A2	8.65198e-06	0.0008541	0.165	A3SS
6899	ENSG00000110719	TCIRG1	0.000246968	0.0167385	-0.235	A3SS
11159	ENSG00000100288	CHKB	4.49249e-10	1.02002e-07	0.219	A3SS
11262	ENSG00000112531	QKI	3.20692e-07	4.16075e-05	0.245	A3SS
12709	ENSG00000076944	STXBP2	2.06347e-11	6.24682e-09	-0.119	A3SS
2536	ENSG00000225889	NA	1.92724e-06	0.000190997	0.165	A5SS
3705	ENSG00000115053	NCL	1.44329e-14	5.92574e-12	0.276	A5SS
4221	ENSG00000077097	TOP2B	2.35092e-05	0.0016087	0.192	A5SS
5830	ENSG00000090621	PABPC4	7.03765e-06	0.000594889	0.113	A5SS
5833	ENSG00000090621	PABPC4	4.78993e-05	0.00299267	0.207	A5SS
6611	ENSG00000134352	IL6ST	9.28562e-07	0.000106747	-0.263	A5SS
7674	ENSG00000167613	LAIR1	0.000382441	0.0180186	-0.168	A5SS
